# Supplementary material
Source: PubMed Central journal article supplement (PMC7960003)
Supplement: 16-00038.pdf [file 16-00038.pdf]

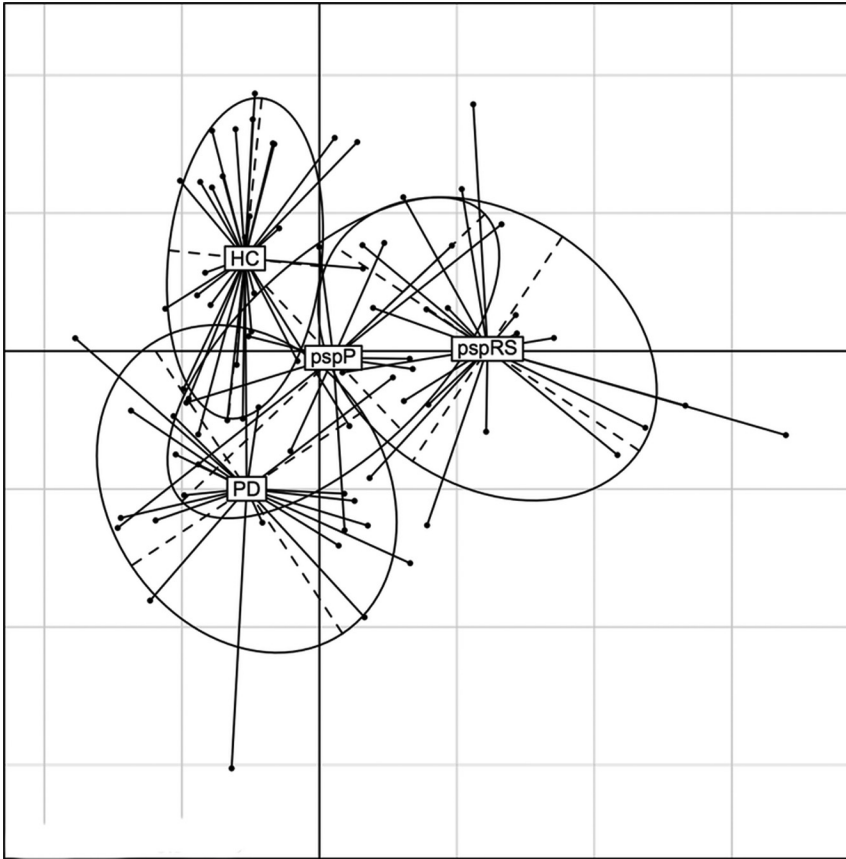

**ON-LINE FIG 1.** Data projected onto the plane defined by the linear discriminant components. Each *ellipse* represents a study group, where the center indicates between-variances, while the area is proportional to the within-variances.
